# Supplementary material for: EXOSC10 is a novel hepatocellular carcinoma prognostic biomarker: a comprehensive bioinformatics analysis and experiment verification
Source: PeerJ journal article supplement (doi:10.7717/peerj.15860), 2023-09-08
Supplement: raw_data-western_blot.zip [file Numeric data from Western Blots.xlsx]

## Sheet: Sheet1
Figure7A
		1		LO2	HepG2	MHCC97H	Huh7						EXOSC10/GAPDH	0.557737	1
			GAPDH	35062.8	42492	40358	41640.8							0.844244	1.5137
														0.801057	1.43626
			EXOSC10	19555.8	35873.6	32329.1	30293.3							0.727492	1.30436
		2	GAPDH	43826.4	35211.7	43262.4	37584.6						EXOSC10/GAPDH	0.689045	1
			EXOSC10	30198.3	41188.8	39299.2	35967.3							1.16975	1.69763
														0.908392	1.31833
														0.956969	1.38883
		3	GAPDH	39114.5	29945.4	39042.6	27376.7						EXOSC10/GAPDH	0.404996	1
														1.62213	4.00531
			EXOSC10	15841.2	48575.5	31624.5	21448.9							0.810001	2.00002
														0.783471	1.93452
Figure7A					EXOSC10	GAPDH
			1	NC	87311	79857	NC	1.09334	1
				siEXOSC10	42469	91173	siEXOSC10	0.465807	0.426039
					EXOSC10	GAPDH
			2	NC	71748	61385	NC	1.16882	1
				siEXOSC10	38837	71730	siEXOSC10	0.541433	0.463231
					EXOSC10	GAPDH
			3	NC	69364	65320	NC	1.06191	1
				siEXOSC10	25197	54531	siEXOSC10	0.462067	0.435128
Figure10A
			E-cadherin	1	37040.9		GAPDH	1	15903.9		2.32905		1
				2	62640.6			2	17498.9		3.57968		1.53697
				3	49809			3	14188.6		3.5105		1
				4	63362.3			4	15782.1		4.01483		1.14366
				5	53319.8			5	18341.3		2.90709		1
				6	57928.5			6	18717.5		3.09488		1.0646
			N-cadherin	1	68109.2		GAPDH	1	16914.1		4.02677		1
				2	26702.7			2	18555.3		1.43909		0.35738
				1	68622.1			3	20202.9		3.39664		1
				2	45965.8			4	15756.5		2.91726		0.858867
				1	65220.5			5	15276.7		4.26928		1
				2	10448			6	12333.4		0.847131		0.198425
			p21	1	16302.8		GAPDH	1	35638.9		0.457443		1
				1	44953			2	25248.6		1.78041		3.8921
				1	54965.8			3	26446.2		2.0784		1
				2	66182.8			4	22395.9		2.95514		1.42183
			p53	1	12044.4		GAPDH	1	15064.1		0.799541		1
				2	21888.8			2	27348.9		0.800356		1.00102
				3	12030.2			3	23938		0.502558		1
				4	19245.5			4	19433.6		0.99032		1.97056
				5	9575.52			5	17416.1		0.549808		1
				6	19302.5			6	15696		1.22977		2.23674
			pp53	1	6456.26		GAPDH	1	14569		0.443149		1
				2	13352.4			2	16328.5		0.817739		1.84529
				3	11760.1			3	14408.9		0.816175		1
				4	15860			4	15416.8		1.02875		1.26046
				5	10950.2			5	18419.3		0.594497		1
				6	20843.7			6	17759.1		1.17369		1.97426
			Bcl2	1	70841.2		GAPDH	1	15406.9		4.59801		1
				2	54418.8			2	17369.4		3.13303		0.681387
				1	66171.7			3	14039.3		4.71332		1
				2	49981.1			4	15988.1		3.12615		0.663259
				1	66597			5	18784		3.54542		1
				2	49921.7			6	18379.7		2.71614		0.766097
			Bax	1	23755.4		GAPDH	1	12594.6		1.88616		1
				2	64338.8			2	16520.2		3.89455		2.0648
				1	59027.7			3	17315.2		3.40902		1
				2	61305.3			4	19119.8		3.20638		0.940557
				1	58707.1			5	17613.1		3.33315		1
				2	72200.4			6	17145.1		4.21114		1.26341
			PARP	1	45651.8		GAPDH	1	12594.6		3.62472		1
				2	29472.9			2	16520.2		1.78405		0.492189
				1	59178.8			3	17315.2		3.41775		1
				2	53963.8			4	19119.8		2.8224		0.825807
				1	57735			5	17613.1		3.27796		1
				2	12998.8			6	17145.1		0.758167		0.231292
